# Supplementary material for: Global Terrapin Character-Based DNA Barcodes: Assessment of the Mitochondrial COI Gene and Conservation Status Revealed a Putative Cryptic Species
Source: MDPI journal article supplement (doi:10.3390/ani13111720), 2023-05-23
Supplement: s1 [file s1]

## Supplementary Figures

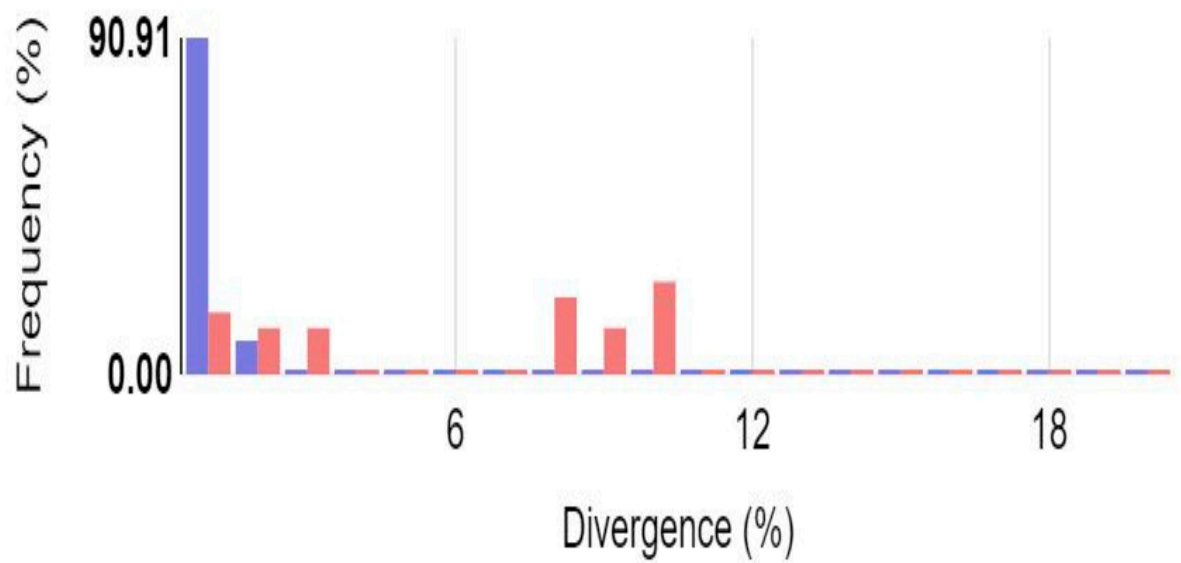

**Supplement Figure S1.** The within-species distribution is normalised to reduce bias in sampling at the species level. This distribution is shown in the histogram compares the distribution of normalised divergences between species (blue) and genera (red).

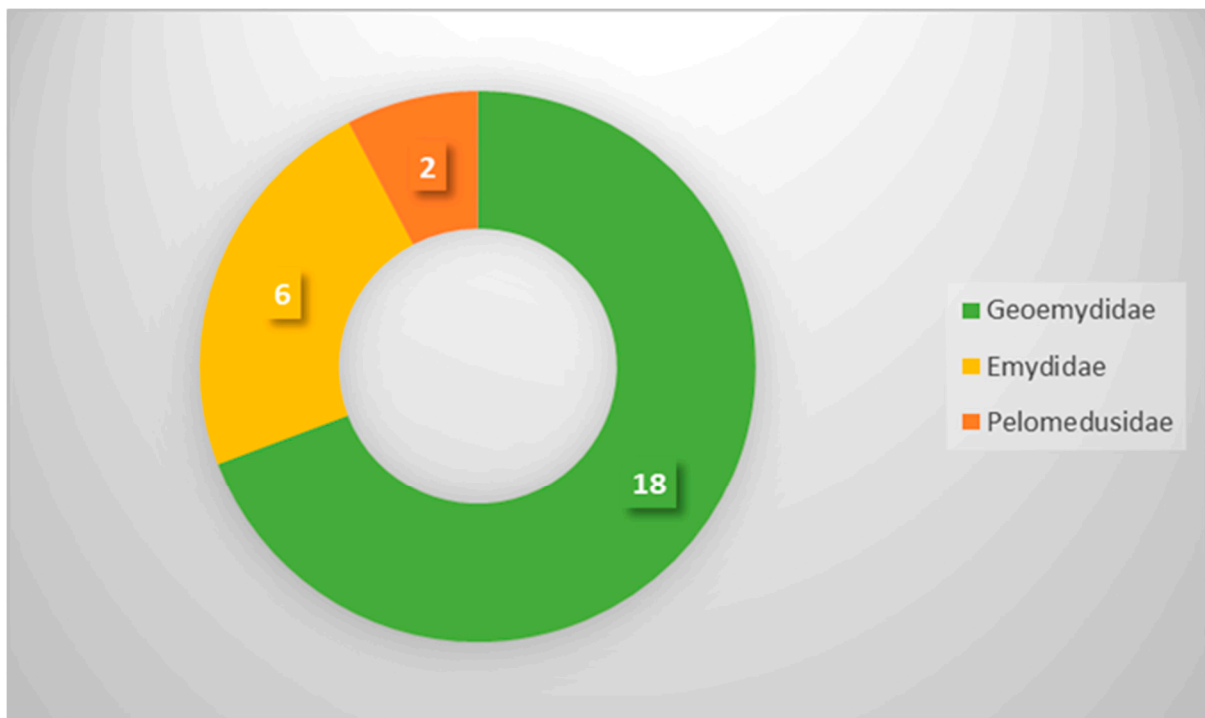

**Supplement Figure S2.** The family of sampled terrapins.

## Supplementary Table

**Supplement Table S1.** Terrapin COI sequence composition (from 26 samples).

| Sequence composition (%)         | Min   | Mean  | Max   | SE     |
|----------------------------------|-------|-------|-------|--------|
| Guanine                          | 14.15 | 16.88 | 18.66 | 0.2114 |
| Citocyne                         | 23.96 | 27.21 | 30.34 | 0.4152 |
| Adenine                          | 25    | 27.5  | 30.31 | 0.3073 |
| Tyrosine                         | 26    | 28.41 | 30.61 | 0.2823 |
| Guanine-Citocyne                 | 40.16 | 44.09 | 47.71 | 0.5384 |
| Guanine-Citocyne codon postion 1 | 48.54 | 52.62 | 55.09 | 0.3597 |
| Guanine-Citocyne codon postion 2 | 40.86 | 43.21 | 45.04 | 0.2275 |
| Guanine-Citocyne codon postion 3 | 26.27 | 36.46 | 45.16 | 1.2697 |

**Supplement Table S2.** DNA barcodes for terrapin based on pure diagnostic characters at selected nucleotide positions. The transition site was highlighted in yellow.

[illegible]

**Supplement Table S3.** The number of terrapin sequences, species, genera, and families is analysed in the present study.

| Family        | Species | Genus | Sequences |
|---------------|---------|-------|-----------|
| Geoemydidae   | 8       | 6     | 18        |
| Emydidae      | 3       | 3     | 6         |
| Pelomedusidae | 1       | 1     | 2         |
